# Supplementary material
Source: ML conference proceedings conference paper supplement (https://proceedings.neurips.cc/paper_files/paper/2015/hash/136f951362dab62e64eb8e841183c2a9-Abstract.html)
Supplement: Supplementary file [file 136f951362dab62e64eb8e841183c2a9-Supplemental.zip]

## 7 Appendix

**Theorem 1.** *With the condition  $\rho \geq \rho^*$ , the optimal value  $\widehat{\text{OPT}}$  of the problem 5 coincides with the optimal value OPT in the problem 8 of interest, where  $\rho^*$  is a problem dependent threshold.*

*Proof.* We start by rewriting formulation 4 to the equivalent form:

$$\min -\frac{1}{|\mathcal{O}|} \sum_{\mathcal{T}^{u,i} \in \mathcal{O}} \ell(\mathcal{T}^{u,i} | \Lambda_0, \mathbf{A}) + \lambda \|\mathbf{Z}_1\|_* + \beta \|\mathbf{Z}_2\|_*, \quad \Lambda_0, \mathbf{A} \geq \mathbf{0}, \Lambda_0 = \mathbf{Z}_1, \mathbf{A} = \mathbf{Z}_2. \quad (8)$$

We can observe that the optimal solution of 8 is a feasible solution of 5 with the same objective function value, so it is evident that  $\widehat{\text{OPT}} \leq \text{OPT}$ . On the other hand, suppose  $(\Lambda_0^*, \mathbf{A}^*, \mathbf{Z}_1^*, \mathbf{Z}_2^*)$  is an optimal solution of 5 with  $\Lambda_0^* \neq \mathbf{Z}_1^*, \mathbf{A}^* \neq \mathbf{Z}_2^*$  in general. Since  $\Lambda_0^*, \mathbf{A}^* \geq \mathbf{0}$ , they are also feasible for 8, so we can find a  $\rho'$  such that  $\lambda \|\mathbf{Z}_1^*\|_* + \beta \|\mathbf{Z}_2^*\|_* + \rho' \|\Lambda_0^* - \mathbf{Z}_1^*\|_F^2 + \rho' \|\mathbf{A}^* - \mathbf{Z}_2^*\|_F^2 \geq \lambda \|\Lambda_0^*\|_* + \beta \|\mathbf{A}^*\|_*$ . Therefore, under the condition that

$$\rho \geq \rho^* = \max \left\{ \frac{\lambda (\|\Lambda_0^*\|_* - \|\mathbf{Z}_1^*\|_*) + \beta (\|\mathbf{A}^*\|_* - \|\mathbf{Z}_2^*\|_*)}{\|\Lambda_0^* - \mathbf{Z}_1^*\|_F^2 + \|\mathbf{A}^* - \mathbf{Z}_2^*\|_F^2} \right\}, \quad (9)$$

we have  $\widehat{\text{OPT}} \geq -\frac{1}{|\mathcal{O}|} \sum_{\mathcal{T}^{u,i} \in \mathcal{O}} \ell(\mathcal{T}^{u,i} | \Lambda_0^*, \mathbf{A}^*) + \lambda \|\Lambda_0^*\|_* + \beta \|\mathbf{A}^*\|_* \geq \text{OPT}$  and readily arrive at the theorem.  $\square$

**Theorem 2.** *Let  $\{\mathbf{Y}^k\}$  be the sequence generated by Algorithm 1,  $\delta^k = 2/(k+1)$ , and  $\eta^k = (\delta^k)^{-1}/L$ ,  $D_1$  and  $D_2$  some problem dependent constants. Then for  $k \geq 1$ , we have*

$$F(\mathbf{Y}^k) - F(\mathbf{X}^*) \leq \frac{4LD_1}{k(k+1)} + \frac{2LD_2}{k+1}. \quad (10)$$

*Proof.* Consider the following general optimization problem

$$\min_{\mathbf{X} \in \Omega} F(\mathbf{X}) := f(\mathbf{X}_1; \mathbf{X}_2) + \Psi(\mathbf{X}_2), \quad (11)$$

where  $\mathbf{X} = [\mathbf{X}_1; \mathbf{X}_2]$ ,  $\Omega = \Omega_1 \times \Omega_2$ ,  $f$  is  $L$ -smooth and convex, and  $\Psi(\cdot)$  is convex. Let  $\delta^k = \frac{1}{k+2}$  and  $\eta^k = (\delta^k)^{-1}/L$ . First Note that  $\mathbf{Y}^k - \mathbf{U}^{k-1} = \delta^k(\mathbf{X}^k - \mathbf{X}^{k-1})$ . By the smoothness of  $f$  where  $f(y) \leq f(x) + \langle f'(x), y - x \rangle + \frac{L}{2} \|y - x\|^2$ , we have

$$\begin{aligned} f(\mathbf{Y}^k) &\leq f(\mathbf{U}^{k-1}) + \nabla f(\mathbf{U}^{k-1})^\top (\mathbf{Y}^k - \mathbf{U}^{k-1}) + \frac{L}{2} \delta_k^2 \|\mathbf{X}_k - \mathbf{X}_{k-1}\|^2 \\ &\quad (\text{by the definition of } \mathbf{Y}^k) \\ &= (1 - \delta^k) (f(\mathbf{U}^{k-1}) + \nabla f(\mathbf{U}^{k-1})^\top (\mathbf{Y}^{k-1} - \mathbf{U}^{k-1})) \\ &\quad + \delta^k (f(\mathbf{U}^{k-1}) + \nabla f(\mathbf{U}^{k-1})^\top (\mathbf{X}^k - \mathbf{U}^{k-1})) + \frac{L}{2} \delta_k^2 \|\mathbf{X}_k - \mathbf{X}_{k-1}\|^2 \quad (12) \\ &\quad (\text{by the convexity of } f) \\ &\leq (1 - \delta^k) f(\mathbf{Y}^{k-1}) + \delta^k (f(\mathbf{U}^{k-1}) + \nabla f(\mathbf{U}^{k-1})^\top (\mathbf{X}^k - \mathbf{U}^{k-1})) \\ &\quad + \frac{L}{2} \delta_k^2 \|\mathbf{X}_k - \mathbf{X}_{k-1}\|^2. \end{aligned}$$

Note the proximal mapping  $\text{Prox}_{x_0}(\xi) := \arg\min_{x \in X} \{V(x, x_0) + \langle \xi, x \rangle\}$ , where  $V(x, x') = \omega(x) - \omega(x') - \langle \nabla \omega(x'), x - x' \rangle$  is the Bregman distance, and  $\omega(x)$  is 1-strongly convex. For any  $\mathbf{X}_1 \in \Omega_1$ , we have the following well-known inequality [20]:

$$\nabla_1 f(\mathbf{U}^{k-1})^\top (\mathbf{X}_1^k - \mathbf{X}_1) \leq (\eta^k)^{-1} [V(\mathbf{X}_1, \mathbf{X}_1^{k-1}) - V(\mathbf{X}_1, \mathbf{X}_1^k) - V(\mathbf{X}_1^k, \mathbf{X}_1^{k-1})]. \quad (13)$$

Besides, by our linear minimization oracle

$$\text{LMO}_\Psi(\nabla_2 f(\mathbf{U}^{k-1})) = \arg\min \{ \langle \nabla_2 f(\mathbf{U}^{k-1}), \mathbf{X}_2 \rangle + \Psi(\mathbf{X}_2) \}, \quad (14)$$

we have

$$\nabla_2 f(\mathbf{U}^{k-1})^\top \mathbf{X}_2^k + \Psi(\mathbf{X}_2^k) \leq \nabla_2 f(\mathbf{U}^{k-1})^\top \mathbf{X}_2 + \Psi(\mathbf{X}_2). \quad (15)$$

As a consequence,

$$\begin{aligned}
& \delta^k (f(\mathbf{U}^{k-1}) + \nabla f(\mathbf{U}^{k-1})^\top (\mathbf{X}^k - \mathbf{U}^{k-1})) \\
&= \delta^k (f(\mathbf{U}^{k-1}) + \nabla_1 f(\mathbf{U}^{k-1})^\top (\mathbf{X}_1^k - \mathbf{U}_1^{k-1}) + \nabla_2 f(\mathbf{U}^{k-1})^\top (\mathbf{X}_2^k - \mathbf{U}_2^{k-1})) \\
&\quad (\text{by equation 15}) \\
&\leq \delta^k (f(\mathbf{U}^{k-1}) + \nabla_1 f(\mathbf{U}^{k-1})^\top (\mathbf{X}_1^k - \mathbf{U}_1^{k-1} + \mathbf{X}_1^* - \mathbf{X}_1^*) \\
&\quad + \nabla_2 f(\mathbf{U}^{k-1})^\top \mathbf{X}_2^* + \Psi(\mathbf{X}_2^*) - \Psi(\mathbf{X}_2^k) - \nabla_2 f(\mathbf{U}^{k-1})^\top \mathbf{U}_2^{k-1}) \\
&\leq \delta^k (f(\mathbf{U}^{k-1}) + \nabla_1 f(\mathbf{U}^{k-1})^\top (\mathbf{X}_1^* - \mathbf{U}_1^{k-1}) + \nabla_2 f(\mathbf{U}^{k-1})^\top (\mathbf{X}_2^* - \mathbf{U}_2^{k-1}) + \Psi(\mathbf{X}_2^*) \\
&\quad + \nabla_1 f(\mathbf{U}^{k-1})^\top (\mathbf{X}_1^k - \mathbf{X}_1^*) - \Psi(\mathbf{X}_2^k)) \\
&\quad (\text{by the convexity of } f) \\
&\leq \delta^k F(\mathbf{X}^*) + \delta^k \nabla_1 f(\mathbf{U}^{k-1})^\top (\mathbf{X}_1^k - \mathbf{X}_1^*) - \delta^k \Psi(\mathbf{X}_2^k) \\
&\quad (\text{by equation 13}) \\
&\leq \delta^k F(\mathbf{X}^*) + \delta^k (\eta^k)^{-1} (V(\mathbf{X}_1^*, \mathbf{X}_1^{k-1}) - V(\mathbf{X}_1^*, \mathbf{X}_1^k) - V(\mathbf{X}_1^k, \mathbf{X}_1^{k-1})) - \delta^k \Psi(\mathbf{X}_2^k) \\
&\quad (\text{by the definition of Bregman distance}) \\
&\leq \delta^k F(\mathbf{X}^*) + L(\delta^k)^2 (V(\mathbf{X}_1^*, \mathbf{X}_1^{k-1}) - V(\mathbf{X}_1^*, \mathbf{X}_1^k)) - \frac{L(\delta^k)^2}{2} \|\mathbf{X}_1^k - \mathbf{X}_1^{k-1}\|^2 - \delta^k \Psi(\mathbf{X}_2^k)
\end{aligned}$$

Plugging into the previous inequality 12, we end up with

$$\begin{aligned}
f(\mathbf{Y}^k) &\leq (1 - \delta^k) f(\mathbf{Y}^{k-1}) + \delta^k F(\mathbf{X}^*) + L(\delta^k)^2 (V(\mathbf{X}_1^*, \mathbf{X}_1^{k-1}) - V(\mathbf{X}_1^*, \mathbf{X}_1^k)) \\
&\quad + \frac{L(\delta^k)^2}{2} \|\mathbf{X}_2^k - \mathbf{X}_2^{k-1}\|^2 - \delta^k \Psi(\mathbf{X}_2^k), \tag{16}
\end{aligned}$$

where we have used the fact  $\|\mathbf{X} = (\mathbf{X}_1; \mathbf{X}_2)\|^2 = \|\mathbf{X}_1\|^2 + \|\mathbf{X}_2\|^2$ . Adding  $\Psi(\mathbf{Y}_2^k)$  to the both sides, we have

$$\begin{aligned}
F(\mathbf{Y}^k) &\leq (1 - \delta^k) F(\mathbf{Y}^{k-1}) + \delta^k F(\mathbf{X}^*) + L(\delta^k)^2 (V(\mathbf{X}_1^*, \mathbf{X}_1^{k-1}) - V(\mathbf{X}_1^*, \mathbf{X}_1^k)) \\
&\quad + \frac{L(\delta^k)^2}{2} \|\mathbf{X}_2^k - \mathbf{X}_2^{k-1}\|^2 + \Psi(\mathbf{Y}_2^k) - \delta^k \Psi(\mathbf{X}_2^k) - (1 - \delta^k) \Psi(\mathbf{Y}_2^{k-1}) \\
&\quad (\text{by the convexity of } \Psi \text{ and the definition of } \mathbf{Y}^k) \tag{17} \\
&\leq (1 - \delta^k) F(\mathbf{Y}^{k-1}) + \delta^k F(\mathbf{X}^*) + L(\delta^k)^2 (V(\mathbf{X}_1^*, \mathbf{X}_1^{k-1}) - V(\mathbf{X}_1^*, \mathbf{X}_1^k)) \\
&\quad + \frac{L(\delta^k)^2}{2} \|\mathbf{X}_2^k - \mathbf{X}_2^{k-1}\|^2.
\end{aligned}$$

Subtracting  $F(\mathbf{X}^*)$  from both sides of the above inequality, we have

$$\begin{aligned}
F(\mathbf{Y}^k) - F(\mathbf{X}^*) &\leq (1 - \delta^k) (F(\mathbf{Y}^{k-1}) - F(\mathbf{X}^*)) + L(\delta^k)^2 (V(\mathbf{X}_1^*, \mathbf{X}_1^{k-1}) - V(\mathbf{X}_1^*, \mathbf{X}_1^k)) \\
&\quad + \frac{L(\delta^k)^2}{2} \|\mathbf{X}_2^k - \mathbf{X}_2^{k-1}\|^2. \tag{18}
\end{aligned}$$

By the fact  $\delta^1 = 1$  and invoking the Lemma 1 of [18], the above inequality implies that

$$F(\mathbf{Y}^k) - F(\mathbf{X}^*) \leq \frac{4L}{k(k+1)} \left( V(\mathbf{X}_1^*, \mathbf{X}_1^0) + \frac{1}{2} \sum_{i=1}^k \|\mathbf{X}_2^i - \mathbf{X}_2^{i-1}\|^2 \right). \tag{19}$$

Let  $D_1 = V(\mathbf{X}_1^*, \mathbf{X}_1^0) \geq 0$  and  $D_2 = \max_{x,y \in \Omega_2} \|x - y\|^2$ , we have

$$F(\mathbf{Y}^k) - F(\mathbf{X}^*) \leq \frac{4LD_1}{k(k+1)} + \frac{2LD_2}{k+1}. \tag{20}$$

□
